# Supplementary material for: Too Cool? Hip Fracture Care and Maintaining Body Temperature
Source: PubMed Central journal article supplement — Geriatr Orthop Surg Rehabil. 2020 Dec 29;11:2151459320949478. doi: 10.1177/2151459320949478 (PMC7783869; doi:10.1177/2151459320949478), 2020-12-29
Supplement: table.pdf [file table.pdf]

| Author              | Year | Country        | Objectives                                                                                                                | Contribution                                                                                           | Data                                                                                                                                                                                                                           | Number of patients | Methodology                                                                                                                                                                                                                        | Conclusion                                                                                                                             |
|---------------------|------|----------------|---------------------------------------------------------------------------------------------------------------------------|--------------------------------------------------------------------------------------------------------|--------------------------------------------------------------------------------------------------------------------------------------------------------------------------------------------------------------------------------|--------------------|------------------------------------------------------------------------------------------------------------------------------------------------------------------------------------------------------------------------------------|----------------------------------------------------------------------------------------------------------------------------------------|
| <i>Kumin et al.</i> | 2019 | United Kingdom | Pilot study investigating forced air vs resistive fabric warming on postoperative infections in hemiarthroplasty patients | Providing direct comparison between FAW and RFW regarding surgical site infection                      | Collected April 2017 – September 2018. Primary endpoint; deep SSI. Secondary endpoint; superficial SSI, inadvertent perioperative hypothermia, mean duration of surgery, median duration of stay and quality of life measures. | 515                | Randomised multi-centre in 1:1 permuted blocks between FAW and RFW. Deep SSI and superficial SSI determined by independent board of reviewers blinded to allocation/ Analysis via EQ-5D-5L index value using stata command eq5dmap | No significant difference between warming techniques                                                                                   |
| Faizi et al.        | 2015 | United Kingdom | Investigating association between lactate levels and admission body temperature                                           | No previous studies at that point had evaluated association between lactate level and body temperature | Collected June 2011 – February 2013. Primary endpoint; lactate levels and tympanic temperature. Also collected                                                                                                                 | 1,162              | Retrospective multi-centre cohort study from the National Hip Fracture Database. Tukey's post hoc analysis performed.                                                                                                              | Significant difference in age between hypothermic and normothermic groups. Significantly higher lactate levels in hypothermic patients |

|                   |      |                |                                                                                                                                      |                                                                                                 |                                                                                                                                                                                                                               |     |                                                                                                                              |                                                                                                                                                                                                                                                                                                                                                                        |
|-------------------|------|----------------|--------------------------------------------------------------------------------------------------------------------------------------|-------------------------------------------------------------------------------------------------|-------------------------------------------------------------------------------------------------------------------------------------------------------------------------------------------------------------------------------|-----|------------------------------------------------------------------------------------------------------------------------------|------------------------------------------------------------------------------------------------------------------------------------------------------------------------------------------------------------------------------------------------------------------------------------------------------------------------------------------------------------------------|
|                   |      |                |                                                                                                                                      |                                                                                                 | demographic data of age and sex                                                                                                                                                                                               |     |                                                                                                                              |                                                                                                                                                                                                                                                                                                                                                                        |
| Williams et al.   | 2018 | United Kingdom | Investigating incidence of inadvertent hypothermia in hip fracture patients and checking associations with readmission and mortality | Little evidence delineates risk factors and outcomes with hip fracture patients and hypothermia | Collected June 2015 – June 2017.<br><br>Primary outcome; hypothermia rate.<br><br>Secondary outcomes; 30-day mortality, 30-day readmission rates.<br><br>Other data included demographic, anaesthetic and surgical variables. | 929 | Retrospective single centre cohort study.<br><br>Chi-squared analysis performed.<br><br>Binary logistical regression formed. | Hypothermia rates increased with age. Patients hypothermic pre-operatively were 1.9x more likely to be hypothermic leaving theatre.<br><br>Statistically significant higher rates of 30-day readmission rates in hypothermia patients.<br><br>There was a trend towards higher 30-day mortality in hypothermic patients although it was not statistically significant. |
| Gurunathan et al. | 2017 | Australia      | Investigating patient journey from holding bay to PACU                                                                               | Agrees with findings in larger trial by <i>Sun et al.</i> which                                 | Collected December 2013 – July 2014.                                                                                                                                                                                          | 87  | Prospective observational study.                                                                                             | A significant drop of temperature occurs                                                                                                                                                                                                                                                                                                                               |

|               |      |               |                                                                            |                                                                                                                   |                                                                                                                                                                                             |      |                                                                                                                                                                                                   |                                                                                                                                                                                                  |
|---------------|------|---------------|----------------------------------------------------------------------------|-------------------------------------------------------------------------------------------------------------------|---------------------------------------------------------------------------------------------------------------------------------------------------------------------------------------------|------|---------------------------------------------------------------------------------------------------------------------------------------------------------------------------------------------------|--------------------------------------------------------------------------------------------------------------------------------------------------------------------------------------------------|
|               |      |               |                                                                            | investigated hypothermia rates in general surgery                                                                 | <p>Primary outcome; serial measurements of tympanic temperature.</p> <p>Other data such as sex, BMI, ASA grade, anaesthetic category and fracture type were collected.</p>                  |      | <p>SSPS data analysis used to summarise demographic and baseline characteristics.</p> <p>ANOVA and T-test used within group differences .</p>                                                     | <p>whilst patients are in the holding bay.</p> <p>1/3 of patients were hypothermic upon entering recovery. Although active warming is used there are still significant rates of hypothermia.</p> |
| Frisch et al. | 2016 | United States | Investigating intraoperative hypothermia's impact on hip fracture patients | First and largest study analysing impact of hypothermia on orthopaedic patients with regards to multiple outcomes | <p>Collected January 2005 – October 2013.</p> <p>Demographic data, surgery specific data, postoperative complications – surgical site infections, length of stay and 30-day readmission</p> | 1525 | <p>Retrospective chart study.</p> <p>Univariate analysis performed via t test and chi-square test.</p> <p>Multivariate logistical regression model built using clinically relevant variables.</p> | Hypothermia was associated with increased rates of deep surgical site infection. Lower BMI and increasing age demonstrated increasing association with hypothermia.                              |

|                |      |                |                                                                                                                 |                                                                                                                                                                       |                                                                                                           |                                           |                                                                                                                                                                                                                                                                                   |                                                                                                                                |
|----------------|------|----------------|-----------------------------------------------------------------------------------------------------------------|-----------------------------------------------------------------------------------------------------------------------------------------------------------------------|-----------------------------------------------------------------------------------------------------------|-------------------------------------------|-----------------------------------------------------------------------------------------------------------------------------------------------------------------------------------------------------------------------------------------------------------------------------------|--------------------------------------------------------------------------------------------------------------------------------|
| Uzoigwe et al. | 2014 | United Kingdom | Investigating hypothermia and low body temperature and its associations with mortality in hip fracture patients | No previous study had explored prevalence and outcomes of hip fracture patients with hypothermia/low body temperature                                                 | Collected June 2011 – May 2012.<br><br>Tympanic temperature, age, sex, ASA and survivorship.              | 781                                       | Prospective cohort study.<br><br>Univariate analysis conducted via Chi-square method.<br><br>Logistic regression performed to adjust for cofounders.<br><br>Kaplan-meier curves constructed and compared with log rank test                                                       | Correcting for cofounding factors, patients who were hypothermic had a 2.8 fold increase in the odds of mortality at 30-days.  |
| Faizi et al.   | 2014 | United Kingdom | Investigating hypothermia and low body temperature and its associations with mortality in hip fracture patients | Follow up from Uzoigwe et al. including a greater patient number.<br><br>No previous studies have assessed using hypothermia as an independent predictor of mortality | Collected June 2011 – February 2013.<br><br>Tympanic temperature, age, sex, AMTS and 30-day survivorship. | 1066 (incl. 781 from prospective cohort). | Retrospective cohort study plus patients from Uzoigwe et al. prospective study.<br><br>Univariate analysis via ANOVA. Tukey's post hoc test was used to determine significant differences. Proportions compared with using Chi-squared.<br><br>Multivariate regression performed. | Those with low body temperatures had an adjusted odd ratios of 30-day mortality that was 2.1 times that of euthermic patients. |
